# Supplementary material for: Experimental Adaptation of the Yellow Fever Virus to the Mosquito Aedes albopictus and Potential risk of urban epidemics in Brazil, South America
Source: PubMed Central journal article supplement (PMC6156417; doi:10.1038/s41598-018-32198-4), 2018-09-25
Supplement: 41598_2018_32198_MOESM1_ESM.pdf [file 41598_2018_32198_MOESM1_ESM.pdf]

**Experimental Adaptation of the Yellow Fever Virus to the Mosquito *Aedes albopictus* and Potential risk of urban epidemics in Brazil, South America.** Fadila Amraoui,<sup>1</sup> Adrien Pain,<sup>2,§</sup> Géraldine Piorkowski,<sup>3,4,§</sup> Marie Vazeille,<sup>1</sup> Dinair Couto-Lima,<sup>5</sup> Xavier de Lamballerie,<sup>3,4,#</sup> Ricardo Lourenço-de-Oliveira,<sup>5,#</sup> Anna-Bella Failloux<sup>1,#</sup>

**Supplementary Table 1 | Nucleotide substitutions in YFV at different passages on *Ae. albopictus* mosquitoes (Manaus and PNMNI).** The mean ratio of nonsynonymous to synonymous nucleotide substitutions ( $dN/dS$ ) per site was calculated. YFV-74018 was used as the reference genome.

| Viral strain | Non-Synonymous | Synonymous | $dN/dS$ |
|--------------|----------------|------------|---------|
| YFV-74018    |                |            |         |
| PNMNI.P1     | 14             | 31         | 0.45    |
| PNMNI.P2     | 13             | 29         | 0.45    |
| PNMNI.P3     | 13             | 31         | 0.42    |
| PNMNI.P4     | 13             | 28         | 0.46    |
| PNMNI.P5     | 13             | 29         | 0.45    |
| PNMNI.P6     | 13             | 28         | 0.46    |
| PNMNI.P6-S   | 13             | 29         | 0.45    |
| PNMNI.P7-S   | 12             | 28         | 0.43    |
| PNMNI.P8-S   | 12             | 28         | 0.43    |
| PNMNI.P9-S   | 12             | 21         | 0.57    |
| PNMNI.P10-S  | 12             | 18         | 0.67    |
| Manaus.P1    | 13             | 31         | 0.42    |
| Manaus.P2    | 13             | 29         | 0.45    |
| Manaus.P3    | 13             | 30         | 0.43    |
| Manaus.P4    | 13             | 27         | 0.48    |
| Manaus.P5    | 13             | 27         | 0.48    |
| Manaus.P6    | 13             | 29         | 0.45    |
| Manaus.P6-S  | 12             | 30         | 0.40    |
| Manaus.P7-S  | 12             | 27         | 0.44    |
| Manaus.P8-S  | 12             | 27         | 0.44    |
| Manaus.P9-S  | 12             | 29         | 0.41    |
| Manaus.P10-S | 12             | 26         | 0.46    |

P, Passage; S, Saliva.

**Supplementary Table 2 | Codon usage bias in YFV at different passages on *Ae. albopictus* mosquitoes (Manaus and PNMNI).** It was measured using the effective number of codon prime ( $Nc'$ )<sup>1</sup>, giving values ranging from 20 (only one codon used for each amino acid) to 61 (random codon usage for each amino acid).

| Viral strain | $Nc'$ |
|--------------|-------|
| YFV-74018    | 53.03 |
| PNMNI.P1     | 52.88 |
| PNMNI.P2     | 52.86 |
| PNMNI.P3     | 52.86 |
| PNMNI.P4     | 52.86 |
| PNMNI.P5     | 52.86 |
| PNMNI.P6     | 52.86 |
| PNMNI.P6-S   | 52.87 |
| PNMNI.P7-S   | 52.88 |
| PNMNI.P8-S   | 52.88 |
| PNMNI.P9-S   | 52.95 |
| PNMNI.P10-S  | 52.94 |
| Manaus.P1    | 52.87 |
| Manaus.P2    | 52.87 |
| Manaus.P3    | 52.90 |
| Manaus.P4    | 52.90 |
| Manaus.P5    | 52.92 |
| Manaus.P6    | 52.92 |
| Manaus.P6-S  | 52.88 |
| Manaus.P7-S  | 52.89 |
| Manaus.P8-S  | 52.94 |
| Manaus.P9-S  | 52.94 |
| Manaus.P10-S | 52.94 |

P, Passage; S, Saliva.

**Supplementary Table 3 | Number of CG dinucleotides in YFV at different passages on *Ae. albopictus* mosquitoes (Manaus and PNMNI).** It corresponds to the quotient of the probability of finding a dinucleotide at a given sequence divided by the product of the probabilities of finding each nucleotide forming the dinucleotide in the same sequence. It was calculated using the Damb software <sup>2</sup>.

| Viral strain | CG (%) |
|--------------|--------|
| YFV-74018    | 13.69  |
| PNMNI.P1     | 13.40  |
| PNMNI.P2     | 13.52  |
| PNMNI.P3     | 13.46  |
| PNMNI.P4     | 13.52  |
| PNMNI.P5     | 13.52  |
| PNMNI.P6     | 13.52  |
| PNMNI.P6-S   | 13.52  |
| PNMNI.P7-S   | 13.52  |
| PNMNI.P8-S   | 13.52  |
| PNMNI.P9-S   | 13.63  |
| PNMNI.P10-S  | 13.63  |
| Manaus.P1    | 13.40  |
| Manaus.P2    | 13.46  |
| Manaus.P3    | 13.34  |
| Manaus.P4    | 13.40  |
| Manaus.P5    | 13.46  |
| Manaus.P6    | 13.40  |
| Manaus.P6-S  | 13.34  |
| Manaus.P7-S  | 13.46  |
| Manaus.P8-S  | 13.40  |
| Manaus.P9-S  | 13.40  |
| Manaus.P10-S | 13.46  |

P, Passage; S, Saliva.

**Supplementary Table 4 | Set of primers used for the sequencing of YFV strains.**

| Sequence (5' to 3')        | Forward/Reverse | nt position |
|----------------------------|-----------------|-------------|
| ATGTCTGGTCGTAAAGCTCAG      | Forward 1       | 119         |
| CTTCCCTCTTTGTGCCACTG       | Reverse 1       | 2154        |
| CCTCAACCAATGATGATGAAG      | Forward 2       | 2040        |
| CACCTCAGCCATAGTGACAG       | Reverse 2       | 3997        |
| GCAGCCATGGTGGAGATTG        | Forward 3       | 3832        |
| AACTTCCATGAGCCACCATAGG     | Reverse 3       | 4711        |
| GATGGGATTTATGGCATATTCCAGTC | Forward 4       | 4636        |
| GCTCRCTGGGTATGTCCGTt       | Reverse 4       | 5595        |
| GCTAGGGCAAATGAAAGyGCA      | Forward 5       | 5494        |
| AGCCACGyTCATGGAACCA        | Reverse 5       | 7832        |
| GTGGGAGTCATGTACAATCTA      | Forward 6       | 7592        |
| TCAGATAAGCTCACCCGGTT       | Reverse 6       | 10354       |

## References

- 1 Novembre, J. A. Accounting for background nucleotide composition when measuring codon usage bias. *Mol Biol Evol* **19**, 1390-1394, doi:10.1093/oxfordjournals.molbev.a004201 (2002).
- 2 Xia, X. & Xie, Z. DAMBE: software package for data analysis in molecular biology and evolution. *J Hered* **92**, 371-373 (2001).
